# Supplementary material for: Self-assembly of phospholipids on flat supports
Source: Royal Society of Chemistry journal article supplement (doi:10.1039/c5cp03358f), 2015-01-01
Supplement: c5cp03358f1.pdf [file c5cp03358f1.pdf]

# **Self Assembly of Phospholipids on Model Supports**

Anil R. Mhashal\* and Sudip Roy\*

*Physical Chemistry Division, National Chemical Laboratory, Pune, India*

E-mail: ar.mhashal@ncl.res.in; s.roy@ncl.res.in

Phone: +91 (020) 2590 3148. Fax: +91 (020) 2590 2615

Table S 1: Non-bonded interaction strength ( $\epsilon_{ij}$  in kJ/mol) between the particles for system Hb3.

| System  | Support | Water | Head | Tail |
|---------|---------|-------|------|------|
| Support | -       | 1.7   | 1.42 | 3.5  |
| Water   | 1.7     | 3.8   | 5    | 2    |
| Head    | 1.42    | 5     | 3.5  | 2    |
| Tail    | 3.5     | 2     | 2    | 3.5  |

Table S 2: Diffusion coefficient

|      | DPPC<br>$\times 10^{-7} \text{ cm}^2/\text{s}$ | $NC3_{lower}$<br>$\times 10^{-7} \text{ cm}^2/\text{s}$ | $NC3_{upper}$<br>$\times 10^{-7} \text{ cm}^2/\text{s}$ |
|------|------------------------------------------------|---------------------------------------------------------|---------------------------------------------------------|
| Hb1  | 1.21±0.16                                      | 1.05±0.18                                               | 1.27±0.08                                               |
| Hb2  | 1.10±0.20                                      | 1.02±0.17                                               | 1.13±0.18                                               |
| Hb3  | 1.09±0.25                                      | 0.95±0.15                                               | 1.17±0.11                                               |
| Hl1  | 0.95±0.21                                      | 0.64±0.28                                               | 1.11±0.18                                               |
| Hl2  | 0.81±0.15                                      | 0.451±0.09                                              | 1.01±0.12                                               |
| Hl3  | 0.59±0.07                                      | 0.23±0.05                                               | 0.82±0.11                                               |
| Mhl1 | 0.70±0.11                                      | 0.437±0.10                                              | 0.80±0.09                                               |
| Mhl2 | 0.55±0.06                                      | 0.20±0.03                                               | 0.74±0.05                                               |

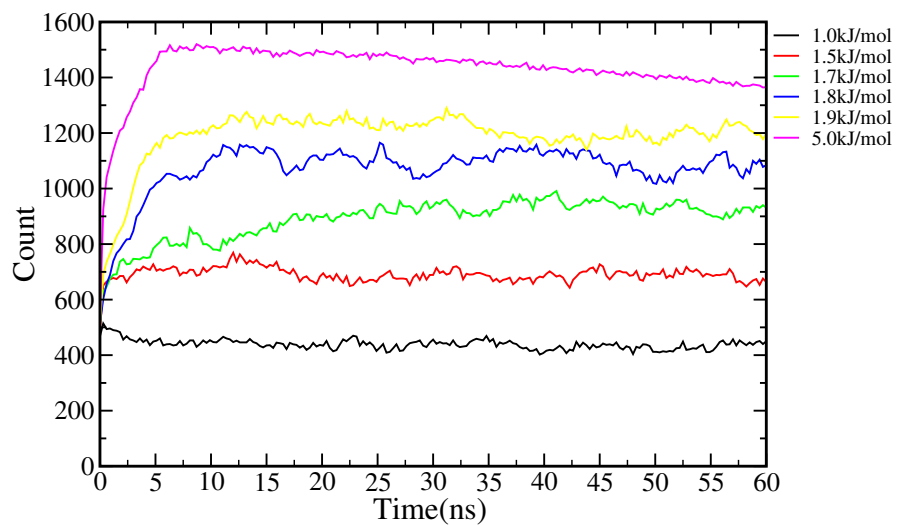

(a)

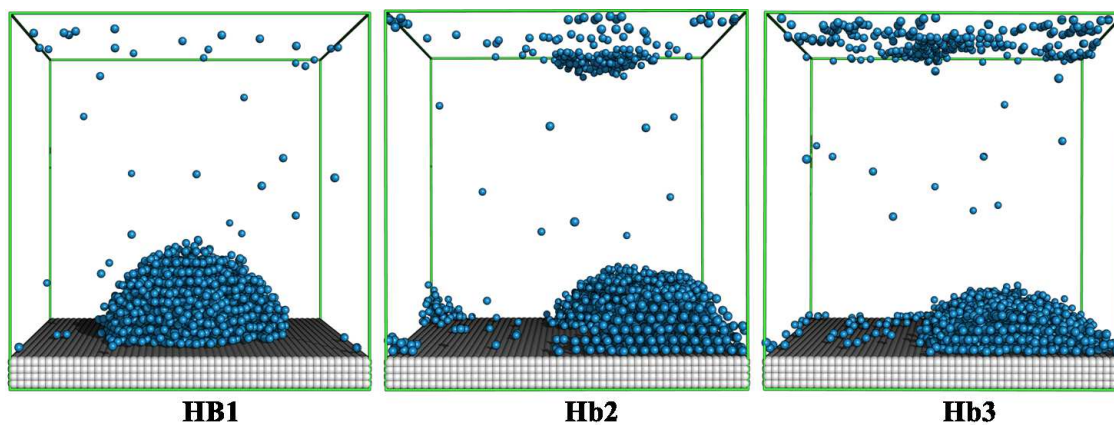

(b)

Figure S 1: a) Water beads count near the support b) final snapshots after 60 ns simulation .

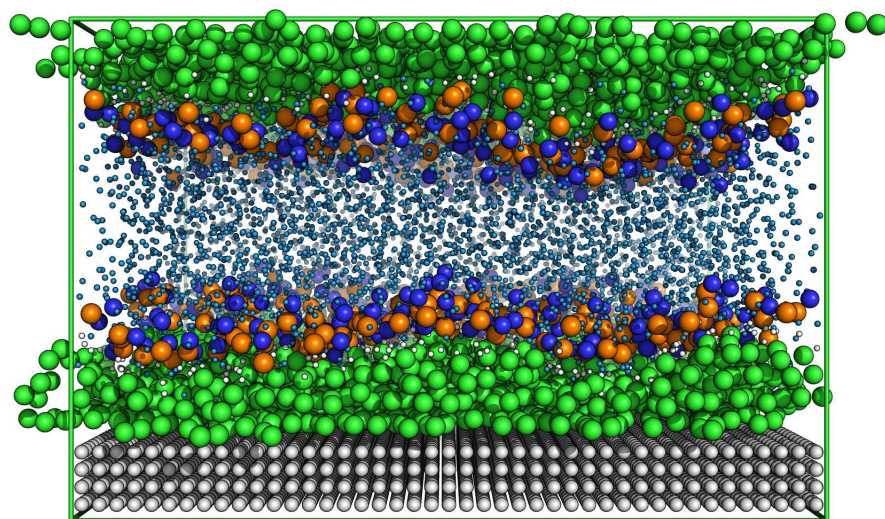

Figure S 2: Final snapshots after  $1\mu s$  simulation.

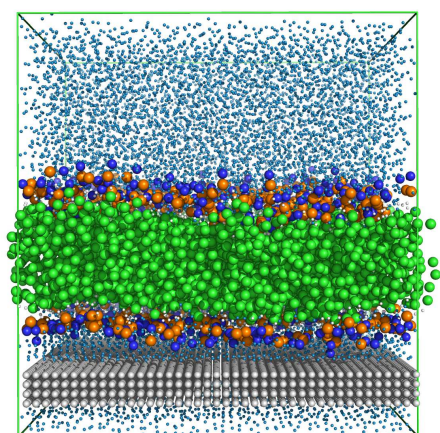

(a)

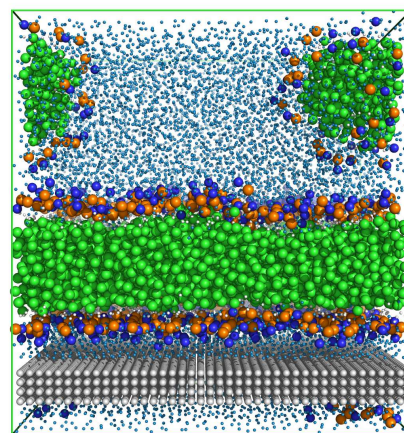

(b)

Figure S 3: Snapshots of a) initial and b) final configurations after 500 ns.

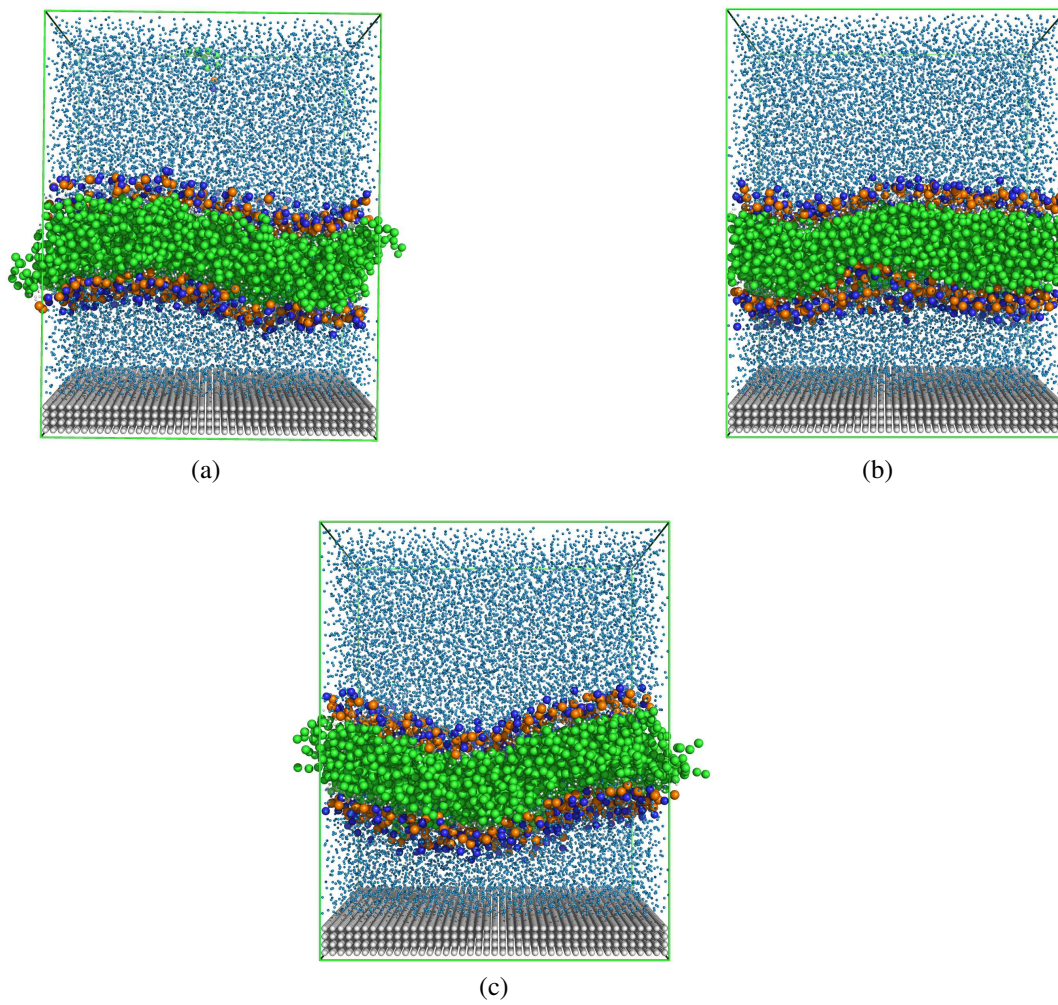

Figure S 4: Snapshots after 80ns for the systems a) H11, b)H12 and c) H13 respectively.

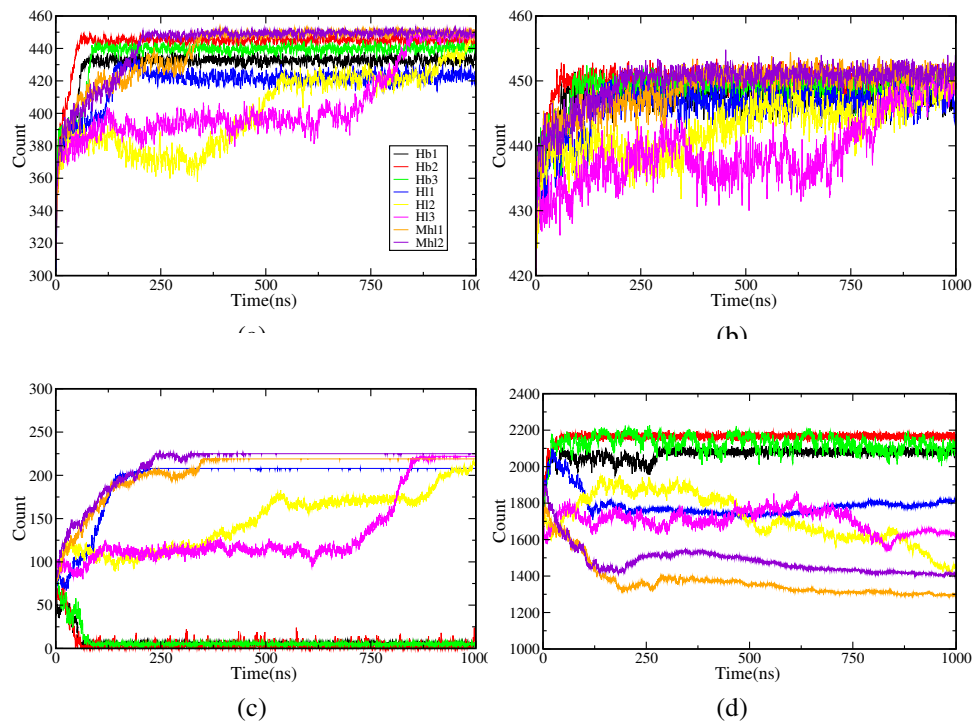

Figure S 5: Number of beads within 0.9 nm distance cut-off of intra a) NC3 bead and b) C1 beads distances as a function of simulation time. Figure c and d shows the number of NC3 and W beads near the support respectively.

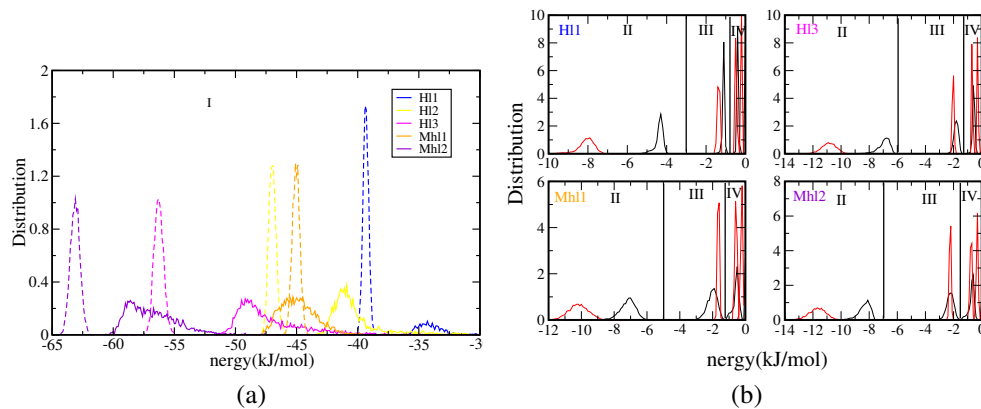

Figure S 6: Potential energies between water-water beads. a) Potential energies between the water beads falling in region I of 0-0.5 nm from support surface. Dotted and solid lines represents W-S and NC3-S interaction energies respectively and colors blue, yellow, magenta, orange and violet represents HI1, HI2, HI3, Mh11 and Mh12 systems respectively b) Potential energy within regions II, III and IV. Color red is W-S and black is NC3-S LJ energies.



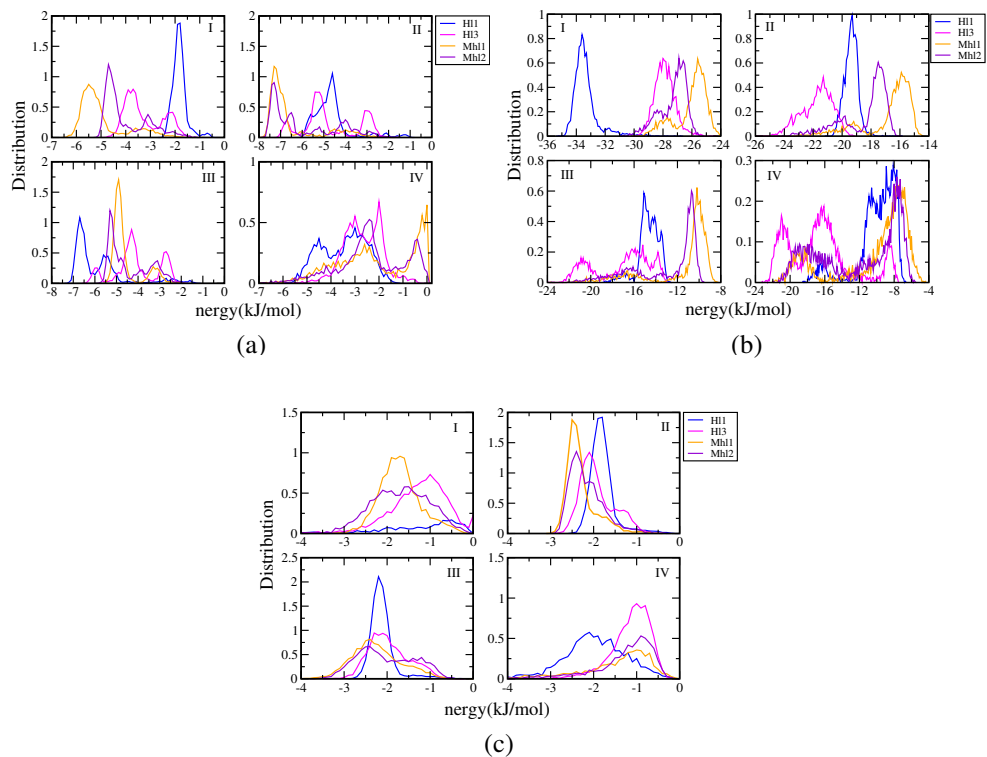

Figure S 7: Potential energy between a) NC3-water beads, b) water-water beads and c) NC3-NC3 beads respectively. Colors blue, magenta, orange and violet represents systems H11, H13, Mh11 and Mh12 respectively
